# Supplementary material
Source: PubMed Central journal article supplement (PMC5207178)

# Supplemental Table 1.

## Top 15 canonical pathways representing differentially expressed genes between ShCTR and ShTonEBP, as identified by Ingenuity Pathway Analysis

| Ingenuity Canonical Pathways                                              | -log(p-value) | Ratio    | Molecules                                                                                                                                                                                                                                                    |
|---------------------------------------------------------------------------|---------------|----------|--------------------------------------------------------------------------------------------------------------------------------------------------------------------------------------------------------------------------------------------------------------|
| Hepatic Fibrosis / Hepatic Stellate Cell Activation                       | 4.97E00       | 1.46E-01 | MMP9,IL6R,COL27A1,EDNRB,COL5A3,LBP,COL1A1,IL6,Flt1,ECE1,NFKB1,BAMBI,LAMA1,IL1B,VEGFA,TGFB2,COL1A2,MMP13,COL5A1,COL5A2,COL11A1,CXCL3,TIMP1,COL11A2,MMP1                                                                                                       |
| Role of Tissue Factor in Cancer                                           | 4.8E00        | 1.75E-01 | GNA11,LIMK2,CSF2,RRAS2,IL1B,VEGFA,PAK1,GNA12,LIMK1,PIK3R5,PIK3C2B,EGR1,MMP13,ARRB1,PTPN11,CASP3,ITGB3,MMP1                                                                                                                                                   |
| Colorectal Cancer Metastasis Signaling                                    | 4E00          | 1.22E-01 | MMP9,WNT5A,FZD2,IL6R,PIK3R5,RHOQ,IL6,ARRB1,WNT11,E2F4,RHOT1,PRKAR1B,TLR2,NFKB1,MMP11,RRAS2,VEGFA,ADCY5,TGFB2,PIK3C2B,MMP13,MMP19,GNG12,CASP3,MMP10,MMP1,MMP14,WNT9A                                                                                          |
| Inhibition of Matrix Metalloproteases                                     | 3.89E00       | 2.5E-01  | MMP11,MMP9,MMP19,MMP10,TFPI2,TIMP1,MMP13,MMP1,MMP14                                                                                                                                                                                                          |
| Role of Osteoblasts, Osteoclasts and Chondrocytes in Rheumatoid Arthritis | 3.71E00       | 1.21E-01 | BIRC2,CSF2,WNT5A,FZD2,PIK3R5,COL1A1,BMP2,IL6,NFKBIA,BIRC3,WNT11,IL11,IL1RN,ITGB3,NFAT5,SPP1,IL18R1,NFKB1,IL1B,PIK3C2B,MMP13,BMPR2,BMP1,MMP1,MMP14,WNT9A                                                                                                      |
| Xenobiotic Metabolism Signaling                                           | 3.63E00       | 1.14E-01 | FTL,PIK3R5,IL6,NQO1,SUMO1,CAT,ALDH1L2,ARNT,MAOA,CHST2,NFKB1,NDST3,RRAS2,NCOA1,IL1B,MAP3K11,HSP90B1,PPM1L,PIK3C2B,HMOX1,CHST11,MAP3K9,Gsta1,SOD3,HS6ST2,MAP3K4,HS3ST1,EIF2AK3,CHST15                                                                          |
| HIF1 $\alpha$ Signaling                                                   | 3.49E00       | 1.55E-01 | MMP11,RRAS2,NCOA1,MMP9,VEGFA,EGLN3,PIK3R5,PIK3C2B,SLC2A1,MMP13,MMP19,MMP10,ARNT,MMP1,MMP14                                                                                                                                                                   |
| Axonal Guidance Signaling                                                 | 3.48E00       | 9.88E-02 | EFNA4,GNA11,MMP9,TUBB3,WNT5A,SEMA4C,FZD2,PAPPA,LIMK1,GNA12,PIK3R5,ADAMTS8,WIPF1,BMP2,EPHA2,PLXNB1,WNT11,GNAI2,PTPN11,PRKAR1B,EFNA1,NFAT5,PLCL1,STK36,GLIS2,SEMA6B,LIMK2,MMP11,RRAS2,VEGFA,GNAT2,PAK1,PIK3C2B,EPHB2,MMP13,PLXND1,BMP1,GNG12,MMP10,PLCZ1,WNT9A |
| Molecular Mechanisms of Cancer                                            | 3.48E00       | 1.03E-01 | BIRC2,GNA11,APAF1,WNT5A,FZD2,GNA12,PIK3R5,IRS1,RHOQ,BMP2,NFKBIA,BIRC3,WNT11,E2F4,GNAI2,CFLAR,PTPN11,CDKN1A,RHOT1,PRKAR1B,RAPGEF1,STK36,NFKB1,RRAS2,NOTCH1,ADCY5,GNAT2,PAK1,RBPJ,TGFB2,PIK3C2B,BMPR2,CDKN1B,BMP1,CASP3,WNT9A                                  |
| Germ Cell-Sertoli Cell Junction Signaling                                 | 3.12E00       | 1.27E-01 | LIMK2,RRAS2,TUBB3,MAP3K11,PAK1,LIMK1,JUP,PVRL2,PIK3R5,TGFB2,PIK3C2B,FER,RHOQ,MAP3K9,ZYX,MYO7A,CLINT1,RHOT1,MAP3K4                                                                                                                                            |
| Chondroitin Sulfate Biosynthesis                                          | 2.9E00        | 1.88E-01 | B4GALT7,CHST2,NDST3,B3GAT3,HS6ST2,HS3ST1,CHST11,CHPF,CHST15                                                                                                                                                                                                  |
| IL-6 Signaling                                                            | 2.74E00       | 1.32E-01 | NFKB1,RRAS2,IL1B,SOCS3,VEGFA,IL6R,PIK3R5,PIK3C2B,COL1A1,LBP,IL6,NFKBIA,MAPKAPK2,IL1RN,PTPN11                                                                                                                                                                 |
| Heparan Sulfate Biosynthesis                                              | 2.71E00       | 1.76E-01 | B4GALT7,CHST2,NDST3,B3GAT3,HS6ST2,HS3ST1,CHST11,EXTL3,CHST15                                                                                                                                                                                                 |
| Dermatan Sulfate Biosynthesis                                             | 2.71E00       | 1.76E-01 | B4GALT7,CHST2,NDST3,B3GAT3,HS6ST2,HS3ST1,CHST11,CHPF,CHST15                                                                                                                                                                                                  |
| Leukocyte Extravasation Signaling                                         | 2.71E00       | 1.12E-01 | F11R,MMP11,MMP9,PIK3R5,ARHGAP1,PIK3C2B,FER,WIPF1,MMP13,EDIL3,GNAI2,MMP19,PTPN11,DLC1,MMP10,ITGB3,TIMP1,JAM3,MAP3K4,MMP1,MMP14                                                                                                                                |

**Supplemental Table 2.****Top biological functions representing differentially expressed genes between ShCTR and ShTonEBP, as identified by Ingenuity Pathway Analysis**

|                                                      | <b>Category</b>                                | <b>P-value</b>    | <b>No. Molecules</b> |
|------------------------------------------------------|------------------------------------------------|-------------------|----------------------|
| <b>Diseases and Disorders</b>                        | Inflammatory Response                          | 3.59E-11-3.61E-04 | 225                  |
|                                                      | Connective Tissue Disorders                    | 5.14E-09-3.06E-04 | 168                  |
|                                                      | Skeletal and Muscular Disorders                | 5.14E-09-3.84E-04 | 207                  |
|                                                      | Organismal Injury and Abnormalities            | 1.2E-08-3.85E-04  | 872                  |
|                                                      | Renal and Urological Disease                   | 1.2E-08-2.56E-04  | 80                   |
| <b>Molecular and Cellular Functions</b>              | Cellular Movement                              | 2.38E-16-3.55E-04 | 269                  |
|                                                      | Cell Death and Survival                        | 2.95E-15-3.44E-04 | 380                  |
|                                                      | Cellular Growth and Proliferation              | 1.58E-11-3.06E-04 | 422                  |
|                                                      | Cellular Development                           | 1.75E-09-3.06E-04 | 339                  |
|                                                      | Cell Morphology                                | 4.74E-08-3.84E-04 | 253                  |
| <b>Physiological System Development and Function</b> | Cardiovascular System Development and Function | 1.23E-12-3.13E-04 | 215                  |
|                                                      | Organismal Development                         | 1.23E-12-3.77E-04 | 353                  |
|                                                      | Hematological System Development and Function  | 3.59E-11-3.77E-04 | 202                  |
|                                                      | Immune Cell Trafficking                        | 3.59E-11-3.55E-04 | 111                  |
|                                                      | Organismal Survival                            | 5.37E-10-7.22E-07 | 273                  |

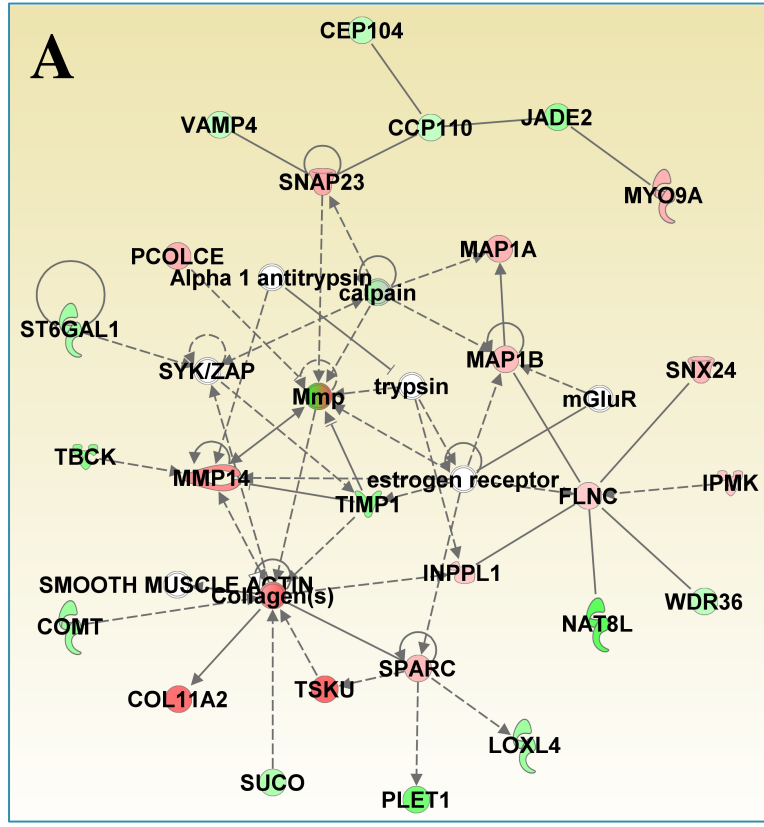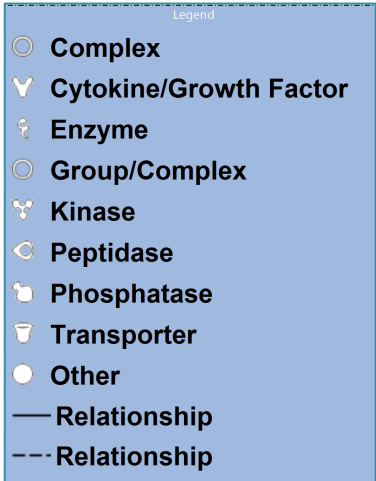

**Supplemental Figure 1. Functional gene network identified using Ingenuity Pathway Analysis (IPA) software from differentially expressed genes between ShCTR and ShTonEBP-transduced NP cells under hypertonic conditions. (A) Network diagram of Skeletal and Muscular Disorders, Connective Tissue Disorders, Cell-to-Cell Signaling and Interaction (score 25, focus molecules: 26). (B) Connective Tissue Disorders, Dermatological Diseases and Conditions, Developmental Disorder (score 25, focus molecules: 26). Each node represents a single gene; node shape denotes functional class of the gene product (i.e., cytokine/growth factor, kinase, transporter). Intensity of node color indicates degree of overexpression (red) or degree of downregulation (green). Uncolored nodes indicate genes that were not differentially expressed between experimental groups, but were incorporated into the network based on information in the IPA database. Edges indicate direct (solid) and indirect (dashed) interactions based on information in the IPA database.**

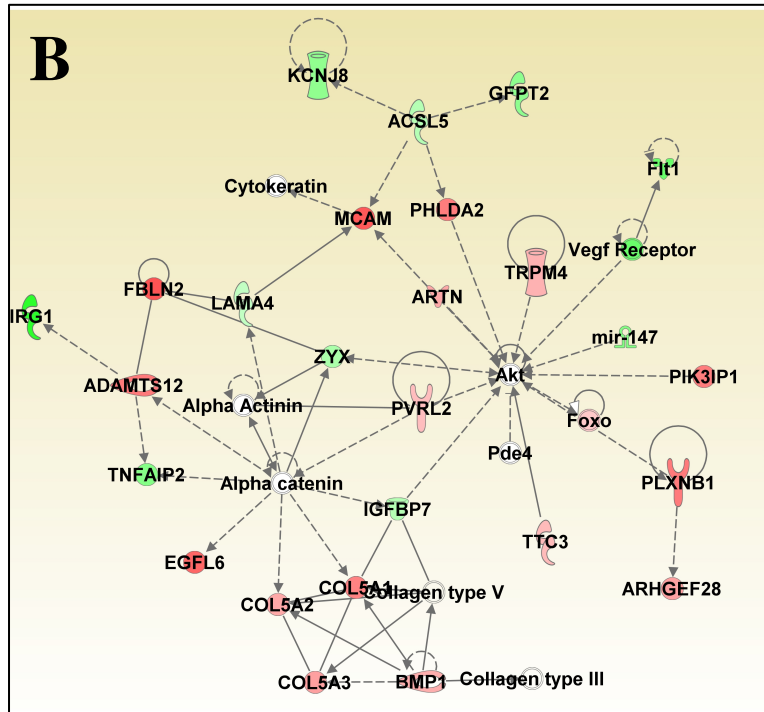

Supplement: 10.1074_M116.757732_jbc.M116.757732-1.pdf [file 10.1074_M116.757732_jbc.M116.757732-1.pdf]
